# Supplementary material for: A novel dinuclear Schiff-base copper(ii) complex modified electrode for ascorbic acid catalytic oxidation and determination
Source: Royal Society of Chemistry journal article supplement (doi:10.1039/c1dt11370d), 2011-11-30
Supplement: c1dt11370d.pdf [file c1dt11370d.pdf]

Supporting Information for

A novel dinuclear Schiff base copper(II) complex modified electrode for ascorbic acid catalytic oxidation and determination

Zhijun Zhang<sup>a</sup>, Xi Li<sup>a, b\*</sup>, Chenggang Wang<sup>c</sup>, Chaocan Zhang<sup>d\*</sup>, Peng Liu<sup>a, b</sup>, Tingting Fang<sup>a</sup>, Yan Xiong<sup>a</sup>, Wenjing Xu<sup>a</sup>  
Yan Xiong<sup>a</sup>, Wenjing Xu<sup>a</sup>

<sup>a</sup>Department of Chemistry, School of Science, Wuhan University of Technology, Wuhan 430070, PR China

<sup>b</sup>Institute of High Pressure and Temperature Physics, School of Science, Wuhan University of Technology, Wuhan 430070, PR China

<sup>c</sup>College of Chemistry, Central China Normal University, Wuhan 430079, PR China

<sup>d</sup>School of Materials Science and Engineering, Wuhan University of Technology, Wuhan 430070, PR China

Table S1 Comparison of the analytical data's obtained by some modified electrodes proposed for the determination of ascorbic acid

| Working electrode  | Modified material                                                                          | pH   | $E_{pa}(V)$           | Method           | Linear range( $\mu M$ ) | Detection Limit( $\mu M$ ) | Ref.         |
|--------------------|--------------------------------------------------------------------------------------------|------|-----------------------|------------------|-------------------------|----------------------------|--------------|
| CPE <sup>a</sup>   | SiO <sub>2</sub> /SnO <sub>2</sub> /Phosphate/Meldola's blue                               | 7.0  | 0.04 vs. SCE          | amperometric     | 0.4 - 2000              | 0.4                        | [1]          |
| GCE <sup>b</sup>   | ruthenium oxide hexacyanoferrate                                                           | 6.9  | 0.1 vs. Ag/Cl(sat)    | FIA <sup>l</sup> | 100 - 1000              | 2.2                        | [2]          |
| GCE                | Poly(direct blue 71)                                                                       | 7.0  | 0.1 vs. Ag/AgCl(sat)  | amperometric     | 1-100                   | 1                          | [3]          |
| RGCDE <sup>c</sup> | cadmium pentacyanonitrosylferrate film                                                     | 7.0  | 0.5 vs. Ag/AgCl(3M)   | voltammetry      | 5 - 50                  | 2.25                       | [4]          |
| GCE                | poly(luminol)/ ZnO-NPs hybrid film                                                         | 7.0  | 0.1 vs. Ag/AgCl(sat)  | amperometric     | 1 - 360                 | 1                          | [5]          |
| CPE                | 2,2'-(1,8-octanediylbisnitriloethylidene)-bis-hydroquinone                                 | 7.0  | 0.169 vs. Ag/AgCl     | DPV <sup>m</sup> | 5 - 30<br>40 - 1500     | 0.6                        | [6]          |
| PtE <sup>d</sup>   | Cu(II)-zeolite                                                                             | 4.5  | 0.11 vs. Ag/AgCl      | CV <sup>n</sup>  | 3 - 6000                | 0.276                      | [7]          |
| AuE <sup>e</sup>   | Laccase/CdTe/cysteine                                                                      | 4.5  | 0.36 vs. SCE          | amperometric     | 10 - 1400               | 1.4                        | [8]          |
| GCE                | Fe(CN) <sub>6</sub> <sup>3-</sup> /PAH/PSS-CaCO <sub>3</sub> /CS <sup>i</sup>              | 7.0  | 0.27 vs. Ag/AgCl(sat) | amperometric     | 1 - 2143                | 0.7                        | [9]          |
| CFME <sup>f</sup>  | nickel oxide /ruthenium hexacyanoferrate                                                   | 2.0  | 0.23 vs. Ag/AgCl(sat) | amperometric     | 10 - 1600               | 1                          | [10]         |
| AuE                | Polyaniline-poly(acrylic acid)                                                             | 6.98 | 0.1 vs. SCE           | amperometric     | 1 - 9300                | 1                          | [11]         |
| GCE                | MWNT-silica-NW-AuNPs                                                                       | 7.0  | 0.23 vs. Ag/AgCl(sat) | CV               | 1000 - 5000             | -                          | [12]         |
| GCE                | Pd nanowire                                                                                | 14.0 | 0.18 vs. Ag/AgCl(sat) | amperometric     | 25 - 900                | 0.2                        | [13]         |
| PGE <sup>g</sup>   | mesopore-rich active carbon                                                                | 7.0  | -0.02 vs. SCE         | amperometric     | 0.5 - 2000              | 0.3                        | [14]         |
| GCE                | NiHCF-PEDOT hybrid Film <sup>j</sup>                                                       | 7.0  | 0.2 vs. Ag/AgCl(sat)  | amperometric     | 5 - 150<br>155 - 300    | 1                          | [15]         |
| GCE                | [1-butyl-3-methylimidazolium] <sub>6</sub> P <sub>2</sub> Mo <sub>18</sub> O <sub>62</sub> | 7.0  | 0.07 vs. Ag/AgCl      | amperometric     | 0.1 - 22000             | <0.1                       | [16]         |
| AuE                | propargyl- functionalized ferrocene                                                        | 7.1  | 0.3 vs. Ag/AgCl(sat)  | EIS <sup>o</sup> | 5pM - 1nM               | 2.6pM                      | [17]         |
| ITOE <sup>h</sup>  | Naphthol green B and layered double hydroxides nanoplatelets                               | 7.5  | 0.7 vs. Ag/AgCl(sat)  | CV               | 1.2 - 55.2              | 0.51                       | [18]         |
| PtE                | ascorbate oxidase in PEDOT/MWCNTs <sup>k</sup>                                             | 6.5  | 0.4 vs. SCE           | amperometric     | 50 - 20000              | 15                         | [19]         |
| AuE                | MWCNT/PANI immobilized with ascorbate oxidase                                              | 5.8  | 0.6 vs. Ag/AgCl       | amperometric     | 2 - 206                 | 0.9                        | [20]         |
| GCE                | [Cu <sub>2</sub> (Sal-Gly) <sub>2</sub> (H <sub>2</sub> O) <sub>2</sub> ]                  | 6.8  | 0.16 vs. SCE          | amperometric     | 2 - 500                 | 0.39                       | Present work |

a CPE carbon paste electrode

b GCE glassy carbon electrode

c RDE rotating glassy carbon disk electrode

d PtE platinum electrode

e AuE gold electrode

f CFME carbon fiber microelectrode

g PGE pyrolytic graphite electrode

h ITOE indium tin oxide electrode

i PAH = poly(allylamine) hydrochloride      PSS = poly(sodium 4-styrenesulfonate)      CS = chitosan

j NiHCF-PEDOT = nickel hexacyanoferrate and poly(3,4-ethylenedioxythiophene) hybrid fil

k PEDOT = poly(3,4-ethylenedioxythiophene)

l FIA = flow injection analysis

m DPV = Differential pulse voltammetry

n CV = Cyclic voltammetry

o EIS = Electrochemical impedance spectroscopy

References:

- [1] R. F. de Castilho, E. B. R. de Souza, R. V. da S. Alfaya and A. A. da S. Alfaya, *Electroanal.*, 2008, **20**, 157.
- [2] T. R. L. C. Paixão, M. Bertotti, *J. Pharm. Biomed. Anal.*, 2008, **46**, 528.
- [3] S. A. Kumar, P. H. Lo and S. M. Chen. *Biosens. Bioelectron.*, 2008, **24**, 518.
- [4] H. Razmi and M. Harasi, *Int. J. Electrochem. Sci.*, 2008, **3**, 82.
- [5] S. A. Kumar, H. W. Cheng and S. M. Chen, *React. Funct. Polym.*, 2009, **69**, 364.
- [6] M. A. Mohammad, H. Fahime, Z. Hamid Reza, N. Hossein and N. Maryam, *J. Appl. Electrochem.*, 2009, **39**, 1117.
- [7] T. Rohani and M. A. Taher, *Talanta*, 2009, **78**, 743.
- [8] Z. Wang, Q. Xu, J. H. Wang, Q. Yang, J. H. Yu and Yuan-Di Zhao, *Microchim. Acta*, 2009, **165**, 387.
- [9] F. Li, C. F. Tang, S. F. Liu and G. R. Ma, *Electrochim. Acta*, 2010, **55**, 838.
- [10] E. A. Hutton, R. Pauliukaitė, S. B. Hocevar, B. Ogorevc and M. R. Smyth, *Anal. Chim. Acta*, 2010, **678**, 176.
- [11] Y. H. Tang, K. X. Pan, X. J. Wang, C. B. Liu and S. L. Luo, *Microchim. Acta*, 2010, **168**, 231.
- [12] D. Ragupathy, A. I. Gopalan and K. P. Lee, *Sens. Actuators B*, 2010, **143**, 696.
- [13] D. Wen, S. J. Guo, S. J. Dong and E. K. Wang. *Biosens. Bioelectron.*, 2010, **26**, 1056.
- [14] G. Z. Hu, Y. Guo, Q. M. Xue, S. J. Shao, *Electrochim. Acta*, 2010, **55**, 2799.
- [15] T. H. Tsai, T. W. Chen and S. M. Chen, *Electroanal.*, 2010, **22**, 1655.
- [16] M. Ammam and E. B. Easton, *Electrochim. Acta*, 2011, **56**, 2847.
- [17] S. Y. Qiu, S. Gao, Q. D. Liu, Z. Y. Lin, B. Qiu and G. N. Chen, *Biosens. Bioelectron.*, 2011, **26**, 4326.
- [18] X. G. Kong, W. Y. Shi, J. W. Zhao, M. Wei and X. Duan, *Talanta*, 2011, **85**, 493.
- [19] M. Liu, Y. P. Wen, J. K. Xu, H. H. He, D. Li, R. R. Yue and G. D. Liu, *Anal. Sci.*, 2011, **27**, 477.
- [20] N. Chauhan, J. Narang and C. S. Pundir, *Analyst*, 2011, **136**, 1938.
